# Supplementary material
Source: PubMed Central journal article supplement (PMC3676148)
Supplement: supp_kws394_kws394_Web_Material.pdf [file supp_kws394_kws394_Web_Material.pdf]

# Web Appendix

## Search strategies

### MEDLINE

(tp53[All Fields] OR p53[All Fields] OR p-53[All Fields] OR tp-53[All Fields]) AND ("neoplasms"[MeSH Terms] OR "neoplasms"[All Fields] OR "cancer"[All Fields] OR carcinoma\* OR cancer OR cancer? OR neoplasm\* OR adenocarcinoma\*) AND (("polymorphism, genetic"[MeSH Terms] OR ("polymorphism"[All Fields] AND "genetic"[All Fields]) OR "genetic polymorphism"[All Fields] OR "polymorphism"[All Fields]) OR arg72pro[All Fields] OR arg72[All Fields] OR pro72[All Fields] OR pro72arg[All Fields] OR rs1042522[All Fields] OR variant\* OR variati\* OR "haplotypes"[MeSH Terms] OR "haplotypes"[All Fields] OR "haplotype"[All Fields] OR polymorph\*)

### Human Genome Epidemiology Literature Finder

Database: [www.hugenavigator.net](http://www.hugenavigator.net)

Search criteria: All publications>>TP53, TP53I3, TP53BP2, TP53RK, TP53INP1, TP53AIP1[Gene]>>Mammary Neoplasms, Invasive Ductal Breast Carcinoma, Carcinoma, Endometrioid, Noninfiltrating Intraductal Carcinoma, Carcinoma, Non-Small-Cell Lung, Colonic Neoplasms, Colorectal Neoplasms, Hereditary Nonpolyposis Colorectal Neoplasms, Endometrial Neoplasms, Neoplasm of lung (disorder), Neoplasms, Hormone-Dependent, ovarian neoplasm, Rectal Neoplasms, Small cell carcinoma of lung[Mesh]

*Note:* In addition to *TP53*, we searched for genes belonging to the p53 pathway to increase the sensitivity of the search (in studies of these genes *TP53* polymorphisms are also often investigated).

**Other databases** (*International Agency for Research on Cancer TP53 database, the p53*

*Website, Genetic Association Database*)

These databases provide annotated bibliography lists; as such, no specific search strategy was constructed.

## List of included studies

1. Commonly studied single-nucleotide polymorphisms and breast cancer: results from the Breast Cancer Association Consortium. *J Natl Cancer Inst.* 2006; **98**(19): 1382-96.
2. Agorastos T, Masouridou S, Lambropoulos AF, Chrisafi S, Miliaras D, Pantazis K, et al. P53 codon 72 polymorphism and correlation with ovarian and endometrial cancer in Greek women. *Eur J Cancer Prev.* 2004; **13**(4): 277-80.
3. Akkiprik M, Sonmez O, Gulluoglu BM, Caglar HB, Kaya H, Demirkalem P, et al. Analysis of p53 gene polymorphisms and protein over-expression in patients with breast cancer. *Pathol Oncol Res.* 2009; **15**(3): 359-68.
4. Alawadi S, Ghabreau L, Alsaleh M, Abdulaziz Z, Rafeek M, Akil N, et al. P53 gene polymorphisms and breast cancer risk in Arab women. *Med Oncol.* 2010.
5. Aoki MN, da Silva do Amaral Herrera AC, Amarante MK, do Val Carneiro JL, Fungaro MH, Watanabe MA. CCR5 and p53 codon 72 gene polymorphisms: implications in breast cancer development. *Int J Mol Med.* 2009; **23**(3): 429-35.
6. Ashton KA, Proietto A, Otton G, Symonds I, McEvoy M, Attia J, et al. Polymorphisms in TP53 and MDM2 combined are associated with high grade endometrial cancer. *Gynecol Oncol.* 2009; **113**(1): 109-14.
7. Baynes C, Healey CS, Pooley KA, Scollen S, Luben RN, Thompson DJ, et al. Common variants in the ATM, BRCA1, BRCA2, CHEK2 and TP53 cancer susceptibility genes are unlikely to increase breast cancer risk. *Breast Cancer Res.* 2007; **9**(2): R27.
8. Birgander R, Sjalander A, Rannug A, Alexandrie AK, Sundberg MI, Seidegard J, et al. P53 polymorphisms and haplotypes in lung cancer. *Carcinogenesis.* 1995; **16**(9): 2233-6.
9. Biroš E, Kalina I, Biroš I, Kohut A, Bogyoiva E, Salagovic J, et al. Polymorphism of the p53 gene within the codon 72 in lung cancer patients. *Neoplasma.* 2001; **48**(5): 407-11.
10. Bisof V, Salihovic MP, Narancic NS, Skaric-Juric T, Jakic-Razumovic J, Janicijevic B, et al. TP53 gene polymorphisms and breast cancer in Croatian women: a pilot study. *Eur J Gynaecol Oncol.* 2010; **31**(5): 539-44.
11. Buller RE, Sood A, Fullenkamp C, Sorosky J, Powills K, Anderson B. The influence of the p53 codon 72 polymorphism on ovarian carcinogenesis and prognosis. *Cancer Gene Ther.* 1997; **4**(4): 239-45.
12. Buyru N, Altinisik J, Demokan S, Dalay N. p53 genotypes and haplotypes associated with risk of breast cancer. *Cancer Detect Prev.* 2007; **31**(3): 207-13.
13. Buyru N, Altinisik J, Isin M, Dalay N. p53 codon 72 polymorphism and HPV status in lung cancer. *Med Sci Monit.* 2008; **14**(9): CR493-7.
14. Buyru N, Tigli H, Dalay N. P53 codon 72 polymorphism in breast cancer. *Oncol Rep.* 2003; **10**(3): 711-4.
15. Caceres DD, Quinones LA, Schroeder JC, Gil LD, Irrarrazabal CE. Association between p53 codon 72 genetic polymorphism and tobacco use and lung cancer risk. *Lung.* 2009; **187**(2): 110-5.
16. Cao Z, Song JH, Park YK, Maeng EJ, Nam SW, Lee JY, et al. The p53 codon 72 polymorphism and susceptibility to colorectal cancer in Korean patients. *Neoplasma.* 2009; **56**(2): 114-8.

17. Cavallone L, Arcand SL, Maugard C, Ghadirian P, Mes-Masson AM, Provencher D, et al. Haplotype analysis of TP53 polymorphisms, Arg72Pro and Ins16, in BRCA1 and BRCA2 mutation carriers of French Canadian descent. *BMC Cancer*. 2008; **8**: 96.
18. Chua HW, Ng D, Choo S, Lum SS, Li H, Soh LY, et al. Effect of MDM2 SNP309 and p53 codon 72 polymorphisms on lung cancer risk and survival among non-smoking Chinese women in Singapore. *BMC Cancer*. 2010; **10**: 88.
19. Costa S, Pinto D, Pereira D, Rodrigues H, Cameselle-Teijeiro J, Medeiros R, et al. Importance of TP53 codon 72 and intron 3 duplication 16bp polymorphisms in prediction of susceptibility on breast cancer. *BMC Cancer*. 2008; **8**: 32.
20. Cox DG, Deer D, Guo Q, Tworoger SS, Hankinson SE, Hunter DJ, et al. The p53 Arg72Pro and MDM2 -309 polymorphisms and risk of breast cancer in the nurses' health studies. *Cancer Causes Control*. 2007; **18**(6): 621-5.
21. Csejtei A, Tibold A, Varga Z, Koltai K, Ember A, Orsos Z, et al. GSTM, GSTT and p53 polymorphisms as modifiers of clinical outcome in colorectal cancer. *Anticancer Res*. 2008; **28**(3B): 1917-22.
22. Dakouras A, Nikiteas N, Papadakis E, Perakis M, Valis D, Rallis G, et al. P53Arg72 homozygosity and its increased incidence in left-sided sporadic colorectal adenocarcinomas, in a Greek-Caucasian population. *Anticancer Res*. 2008; **28**(2A): 1039-43.
23. Damin AP, Frazzon AP, Damin DC, Roehe A, Hermes V, Zettler C, et al. Evidence for an association of TP53 codon 72 polymorphism with breast cancer risk. *Cancer Detect Prev*. 2006; **30**(6): 523-9.
24. De Vecchi G, Verderio P, Pizzamiglio S, Manoukian S, Bernard L, Pensotti V, et al. The p53 Arg72Pro and Ins16bp polymorphisms and their haplotypes are not associated with breast cancer risk in BRCA-mutation negative familial cases. *Cancer Detect Prev*. 2008; **32**(2): 140-3.
25. Denisov EV, Cherdynseva NV, Litvyakov NV, Slonimskaya EM, Malinovskaya EA, Voevoda MI, et al. TP53 mutations and Arg72Pro polymorphism in breast cancers. *Cancer Genet Cytogenet*. 2009; **192**(2): 93-5.
26. Ebner F, Schremmer-Danninger E, Rehbock J. The role of TP53 and p21 gene polymorphisms in breast cancer biology in a well specified and characterized German cohort. *J Cancer Res Clin Oncol*. 2010; **136**(9): 1369-75.
27. Eren F, Akkiprik M, Atug O, Sonmez O, Tahan G, Ozdemir F, et al. R72P polymorphism of TP53 in ulcerative colitis patients is associated with the incidence of colectomy, use of steroids and the presence of a positive family history. *Pathol Oncol Res*. 2010; **16**(4): 563-8.
28. Esteller M, Garcia A, Martinez-Palones JM, Xercavins J, Reventos J. Susceptibility to endometrial cancer: influence of allelism at p53, glutathione S-transferase (GSTM1 and GSTT1) and cytochrome P-450 (CYP1A1) loci. *Br J Cancer*. 1997; **75**(9): 1385-8.
29. Fernandez-Rubio A, Lopez-Cima MF, Gonzalez-Arriaga P, Garcia-Castro L, Pascual T, Marron MG, et al. The TP53 Arg72Pro polymorphism and lung cancer risk in a population of Northern Spain. *Lung Cancer*. 2008; **61**(3): 309-16.
30. Franekova M, Zubor P, Stanclova A, Dussan CA, Bohusova T, Galo S, et al. Association of p53 polymorphisms with breast cancer: a case-control study in Slovak population. *Neoplasma*. 2007; **54**(2): 155-61.

31. Garcia-Closas M, Kristensen V, Langerod A, Qi Y, Yeager M, Burdett L, et al. Common genetic variation in TP53 and its flanking genes, WDR79 and ATP1B2, and susceptibility to breast cancer. *Int J Cancer*. 2007; **121**(11): 2532-8.
32. Gaudet MM, Gammon MD, Bensen JT, Sagiv SK, Shantakumar S, Teitelbaum SL, et al. Genetic variation of TP53, polycyclic aromatic hydrocarbon-related exposures, and breast cancer risk among women on Long Island, New York. *Breast Cancer Res Treat*. 2008; **108**(1): 93-9.
33. Gemignani F, Moreno V, Landi S, Moullan N, Chabrier A, Gutierrez-Enriquez S, et al. A TP53 polymorphism is associated with increased risk of colorectal cancer and with reduced levels of TP53 mRNA. *Oncogene*. 2004; **23**(10): 1954-6.
34. Ghasemi N, Karimi-Zarchi M, Mortazavi-Zadeh MR, Atash-Afza A. Evaluation of the frequency of TP53 gene codon 72 polymorphisms in Iranian patients with endometrial cancer. *Cancer Genet Cytogenet*. 2010; **196**(2): 167-70.
35. Giuliani L, Jaxmar T, Casadio C, Gariglio M, Manna A, D'Antonio D, et al. Detection of oncogenic viruses SV40, BKV, JCV, HCMV, HPV and p53 codon 72 polymorphism in lung carcinoma. *Lung Cancer*. 2007; **57**(3): 273-81.
36. Grunhage F, Jungck M, Lamberti C, Berg C, Becker U, Schulte-Witte H, et al. Association of familial colorectal cancer with variants in the E-cadherin (CDH1) and cyclin D1 (CCND1) genes. *Int J Colorectal Dis*. 2008; **23**(2): 147-54.
37. Hamajima N, Matsuo K, Suzuki T, Nakamura T, Matsuura A, Hatooka S, et al. No associations of p73 G4C14-to-A4T14 at exon 2 and p53 Arg72Pro polymorphisms with the risk of digestive tract cancers in Japanese. *Cancer Lett*. 2002; **181**(1): 81-5.
38. Helland A, Langerod A, Johnsen H, Olsen AO, Skovlund E, Borresen-Dale AL. p53 polymorphism and risk of cervical cancer. *Nature*. 1998; **396**(6711): 530-1; author reply 2.
39. Henriquez-Hernandez LA, Murias-Rosales A, Hernandez Gonzalez A, Cabrera De Leon A, Diaz-Chico BN, Mori De Santiago M, et al. Gene polymorphisms in TYMS, MTHFR, p53 and MDR1 as risk factors for breast cancer: a case-control study. *Oncol Rep*. 2009; **22**(6): 1425-33.
40. Hiraki A, Matsuo K, Hamajima N, Ito H, Hatooka S, Suyama M, et al. Different risk relations with smoking for non-small-cell lung cancer: comparison of TP53 and TP73 genotypes. *Asian Pac J Cancer Prev*. 2003; **4**(2): 107-12.
41. Honma HN, De Capitani EM, Perroud MW, Jr., Barbeiro AS, Toro IF, Costa DB, et al. Influence of p53 codon 72 exon 4, GSTM1, GSTT1 and GSTP1\*B polymorphisms in lung cancer risk in a Brazilian population. *Lung Cancer*. 2008; **61**(2): 152-62.
42. Hrstka R, Beranek M, Klocova K, Nenutil R, Vojtesek B. Intronic polymorphisms in TP53 indicate lymph node metastasis in breast cancer. *Oncol Rep*. 2009; **22**(5): 1205-11.
43. Huang XE, Hamajima N, Katsuda N, Matsuo K, Hirose K, Mizutani M, et al. Association of p53 codon Arg72Pro and p73 G4C14-to-A4T14 at exon 2 genetic polymorphisms with the risk of Japanese breast cancer. *Breast Cancer*. 2003; **10**(4): 307-11.
44. Hung RJ, Boffetta P, Canzian F, Moullan N, Szeszenia-Dabrowska N, Zaridze D, et al. Sequence variants in cell cycle control pathway, X-ray exposure, and lung cancer risk: a multicenter case-control study in Central Europe. *Cancer Res*. 2006; **66**(16): 8280-6.
45. Ihsan R, Devi TR, Yadav DS, Mishra AK, Sharma J, Zomawia E, et al. Investigation on the Role of p53 Codon 72 Polymorphism and Interactions with Tobacco, Betel Quid,

- and Alcohol in Susceptibility to Cancers in a High-Risk Population from North East India. *DNA Cell Biol.* 2011; **30**(3): 163-71.
46. Irarrazabal CE, Rojas C, Aracena R, Marquez C, Gil L. Chilean pilot study on the risk of lung cancer associated with codon 72 polymorphism in the gene of protein p53. *Toxicol Lett.* 2003; **144**(1): 69-76.
47. Jain N, Singh V, Hedau S, Kumar S, Daga MK, Dewan R, et al. Infection of human papillomavirus type 18 and p53 codon 72 polymorphism in lung cancer patients from India. *Chest.* 2005; **128**(6): 3999-4007.
48. Jin X, Wu X, Roth JA, Amos CI, King TM, Branch C, et al. Higher lung cancer risk for younger African-Americans with the Pro/Pro p53 genotype. *Carcinogenesis.* 1995; **16**(9): 2205-8.
49. Joshi AM, Budhathoki S, Ohnaka K, Mibu R, Tanaka M, Kakeji Y, et al. TP53 R72P and MDM2 SNP309 polymorphisms and colorectal cancer risk: the Fukuoka Colorectal Cancer Study. *Jpn J Clin Oncol.* 2011; **41**(2): 232-8.
50. Jung HY, Whang YM, Sung JS, Shin HD, Park BL, Kim JS, et al. Association study of TP53 polymorphisms with lung cancer in a Korean population. *J Hum Genet.* 2008; **53**(6): 508-14.
51. Kalemi TG, Lambropoulos AF, Gueorguiev M, Chrisafi S, Papazisis KT, Kotsis A. The association of p53 mutations and p53 codon 72, Her 2 codon 655 and MTHFR C677T polymorphisms with breast cancer in Northern Greece. *Cancer Lett.* 2005; **222**(1): 57-65.
52. Kara N, Karakus N, Ulusoy AN, Ozaslan C, Gungor B, Bagci H. P53 codon 72 and HER2 codon 655 polymorphisms in Turkish breast cancer patients. *DNA Cell Biol.* 2010; **29**(7): 387-92.
53. Katiyar S, Thelma BK, Murthy NS, Hedau S, Jain N, Gopalkrishna V, et al. Polymorphism of the p53 codon 72 Arg/Pro and the risk of HPV type 16/18-associated cervical and oral cancer in India. *Mol Cell Biochem.* 2003; **252**(1-2): 117-24.
54. Kaushal M, Mishra AK, Raju BS, Ihsan R, Chakraborty A, Sharma J, et al. Betel quid chewing as an environmental risk factor for breast cancer. *Mutat Res.* 2010; **703**(2): 143-8.
55. Kawajiri K, Nakachi K, Imai K, Watanabe J, Hayashi S. Germ line polymorphisms of p53 and CYP1A1 genes involved in human lung cancer. *Carcinogenesis.* 1993; **14**(6): 1085-9.
56. Kazemi M, Salehi Z, Chakosari RJ. TP53 codon 72 polymorphism and breast cancer in northern Iran. *Oncol Res.* 2009; **18**(1): 25-30.
57. Keshava C, Frye BL, Wolff MS, McCanlies EC, Weston A. Waf-1 (p21) and p53 polymorphisms in breast cancer. *Cancer Epidemiol Biomarkers Prev.* 2002; **11**(1): 127-30.
58. Khadang B, Fattahi MJ, Talei A, Dehaghani AS, Ghaderi A. Polymorphism of TP53 codon 72 showed no association with breast cancer in Iranian women. *Cancer Genet Cytogenet.* 2007; **173**(1): 38-42.
59. Khaliq S, Hameed A, Khaliq T, Ayub Q, Qamar R, Mohyuddin A, et al. P53 mutations, polymorphisms, and haplotypes in Pakistani ethnic groups and breast cancer patients. *Genet Test.* 2000; **4**(1): 23-9.

60. Kiyohara C, Horiuchi T, Miyake Y, Takayama K, Nakanishi Y. Cigarette smoking, TP53 Arg72Pro, TP53BP1 Asp353Glu and the risk of lung cancer in a Japanese population. *Oncol Rep.* 2010; **23**(5): 1361-8.
61. Koushik A, Tranah GJ, Ma J, Stampfer MJ, Sesso HD, Fuchs CS, et al. p53 Arg72Pro polymorphism and risk of colorectal adenoma and cancer. *Int J Cancer.* 2006; **119**(8): 1863-8.
62. Kruger S, Bier A, Engel C, Mangold E, Pagenstecher C, von Knebel Doeberitz M, et al. The p53 codon 72 variation is associated with the age of onset of hereditary non-polyposis colorectal cancer (HNPCC). *J Med Genet.* 2005; **42**(10): 769-73.
63. Lang A, Palmeback Wegman P, Wingren S. The significance of MDM2 SNP309 and p53 Arg72Pro in young women with breast cancer. *Oncol Rep.* 2009; **22**(3): 575-9.
64. Li T, Lu ZM, Guo M, Wu QJ, Chen KN, Xing HP, et al. p53 codon 72 polymorphism (C/G) and the risk of human papillomavirus-associated carcinomas in China. *Cancer.* 2002; **95**(12): 2571-6.
65. Liu G, Miller DP, Zhou W, Thurston SW, Fan R, Xu LL, et al. Differential association of the codon 72 p53 and GSTM1 polymorphisms on histological subtype of non-small cell lung carcinoma. *Cancer Res.* 2001; **61**(24): 8718-22.
66. Lum SS, Chua HW, Li H, Li WF, Rao N, Wei J, et al. MDM2 SNP309 G allele increases risk but the T allele is associated with earlier onset age of sporadic breast cancers in the Chinese population. *Carcinogenesis.* 2008; **29**(4): 754-61.
67. Ma H, Hu Z, Zhai X, Wang S, Wang X, Qin J, et al. Joint effects of single nucleotide polymorphisms in P53BP1 and p53 on breast cancer risk in a Chinese population. *Carcinogenesis.* 2006; **27**(4): 766-71.
68. Mabrouk I, Baccouche S, El-Abed R, Mokdad-Gargouri R, Mosbah A, Said S, et al. No evidence of correlation between p53 codon 72 polymorphism and risk of bladder or breast carcinoma in Tunisian patients. *Ann N Y Acad Sci.* 2003; **1010**: 764-70.
69. Mahasneh AA, Abdel-Hafiz SS. Polymorphism of p53 gene in Jordanian population and possible associations with breast cancer and lung adenocarcinoma. *Saudi Med J.* 2004; **25**(11): 1568-73.
70. MARIE-GENICA Consortium on Genetic Susceptibility for Menopausal Hormone Therapy Related Breast Cancer Risk. Polymorphisms in the BRCA1 and ABCB1 genes modulate menopausal hormone therapy associated breast cancer risk in postmenopausal women. *Breast Cancer Res Treat.* 2010; **120**(3):727-36.
71. Matullo G, Dunning AM, Guarrera S, Baynes C, Polidoro S, Garte S, et al. DNA repair polymorphisms and cancer risk in non-smokers in a cohort study. *Carcinogenesis.* 2006; **27**(5): 997-1007.
72. Mechanic LE, Bowman ED, Welsh JA, Khan MA, Hagiwara N, Enewold L, et al. Common genetic variation in TP53 is associated with lung cancer risk and prognosis in African Americans and somatic mutations in lung tumors. *Cancer Epidemiol Biomarkers Prev.* 2007; **16**(2): 214-22.
73. Menzel HJ, Sarmanova J, Soucek P, Berberich R, Grunewald K, Haun M, et al. Association of NQO1 polymorphism with spontaneous breast cancer in two independent populations. *Br J Cancer.* 2004; **90**(10): 1989-94.
74. Mojtahedi Z, Haghshenas MR, Hosseini SV, Fattahi MJ, Ghaderi A. p 53 codon 72 polymorphism in stomach and colorectal adenocarcinomas in Iranian patients. *Indian J Cancer.* 2010; **47**(1): 31-4.

75. Morari EC, Lima AB, Bufalo NE, Leite JL, Granja F, Ward LS. Role of glutathione-S-transferase and codon 72 of P53 genotypes in epithelial ovarian cancer patients. *J Cancer Res Clin Oncol*. 2006; **132**(8): 521-8.
76. Murata M, Tagawa M, Kimura M, Kimura H, Watanabe S, Saisho H. Analysis of a germ line polymorphism of the p53 gene in lung cancer patients; discrete results with smoking history. *Carcinogenesis*. 1996; **17**(2): 261-4.
77. Nadji SA, Mahmoodi M, Ziaee AA, Naghshvar F, Torabizadeh J, Yahyapour Y, et al. An increased lung cancer risk associated with codon 72 polymorphism in the TP53 gene and human papillomavirus infection in Mazandaran province, Iran. *Lung Cancer*. 2007; **56**(2): 145-51.
78. Niwa Y, Hirose K, Matsuo K, Tajima K, Ikoma Y, Nakanishi T, et al. Association of p73 G4C14-to-A4T14 polymorphism at exon 2 and p53 Arg72Pro polymorphism with the risk of endometrial cancer in Japanese subjects. *Cancer Lett*. 2005; **219**(2): 183-90.
79. Noma C, Miyoshi Y, Taguchi T, Tamaki Y, Noguchi S. Association of p53 genetic polymorphism (Arg72Pro) with estrogen receptor positive breast cancer risk in Japanese women. *Cancer Lett*. 2004; **210**(2): 197-203.
80. Nordgard SH, Alnaes GI, Hihn B, Lingjaerde OC, Liestol K, Tsalenko A, et al. Pathway based analysis of SNPs with relevance to 5-FU therapy: relation to intratumoral mRNA expression and survival. *Int J Cancer*. 2008; **123**(3): 577-85.
81. Ohayon T, Gershoni-Baruch R, Papa MZ, Distelman Menachem T, Eisenberg Barzilai S, Friedman E. The R72P P53 mutation is associated with familial breast cancer in Jewish women. *Br J Cancer*. 2005; **92**(6): 1144-8.
82. Olschwang S, Laurent-Puig P, Vassal A, Salmon RJ, Thomas G. Characterization of a frequent polymorphism in the coding sequence of the Tp53 gene in colonic cancer patients and a control population. *Hum Genet*. 1991; **86**(4): 369-70.
83. Pal R, Gochhait S, Chattopadhyay S, Gupta P, Prakash N, Agarwal G, et al. Functional implication of TRAIL -716 C/T promoter polymorphism on its in vitro and in vivo expression and the susceptibility to sporadic breast tumor. *Breast Cancer Res Treat*. 2011; **126**(2): 333-43.
84. Papadakis ED, Soultzis N, Spandidos DA. Association of p53 codon 72 polymorphism with advanced lung cancer: the Arg allele is preferentially retained in tumours arising in Arg/Pro germline heterozygotes. *Br J Cancer*. 2002; **87**(9): 1013-8.
85. Papadakis EN, Dokianakis DN, Spandidos DA. p53 codon 72 polymorphism as a risk factor in the development of breast cancer. *Mol Cell Biol Res Commun*. 2000; **3**(6): 389-92.
86. Park JK, Lee HJ, Kim JW, Park YH, Lee SS, Chang HI, et al. Differences in p53 gene polymorphisms between Korean schizophrenia and lung cancer patients. *Schizophr Res*. 2004; **67**(1): 71-4.
87. Pegoraro RJ, Moodley M, Rom L, Chetty R, Moodley J. P53 codon 72 polymorphism and BRCA 1 and 2 mutations in ovarian epithelial malignancies in black South Africans. *Int J Gynecol Cancer*. 2003; **13**(4): 444-9.
88. Peller S, Halperin R, Schneider D, Kopilova Y, Rotter V. Polymorphisms of the p53 gene in women with ovarian or endometrial carcinoma. *Oncol Rep*. 1999; **6**(1): 193-7.
89. Perez LO, Abba MC, Dulout FN, Golijow CD. Evaluation of p53 codon 72 polymorphism in adenocarcinomas of the colon and rectum in La Plata, Argentina. *World J Gastroenterol*. 2006; **12**(9): 1426-9.

90. Perfumo C, Bonelli L, Menichini P, Inga A, Gismondi V, Ciferri E, et al. Increased risk of colorectal adenomas in Italian subjects carrying the p53 PIN3 A2-Pro72 haplotype. *Digestion*. 2006; **74**(3-4): 228-35.
91. Piao JM, Kim HN, Song HR, Kweon SS, Choi JS, Yun WJ, et al. p53 codon 72 polymorphism and the risk of lung cancer in a Korean population. *Lung Cancer*. 2011.
92. Pierce LM, Sivaraman L, Chang W, Lum A, Donlon T, Seifried A, et al. Relationships of TP53 codon 72 and HRAS1 polymorphisms with lung cancer risk in an ethnically diverse population. *Cancer Epidemiol Biomarkers Prev*. 2000; **9**(11): 1199-204.
93. Polakova V, Pardini B, Naccarati A, Landi S, Slyskova J, Novotny J, et al. Genotype and haplotype analysis of cell cycle genes in sporadic colorectal cancer in the Czech Republic. *Hum Mutat*. 2009; **30**(4): 661-8.
94. Popanda O, Edler L, Waas P, Schattenberg T, Butkiewicz D, Muley T, et al. Elevated risk of squamous-cell carcinoma of the lung in heavy smokers carrying the variant alleles of the TP53 Arg72Pro and p21 Ser31Arg polymorphisms. *Lung Cancer*. 2007; **55**(1): 25-34.
95. Rajkumar T, Samson M, Rama R, Sridevi V, Mahji U, Swaminathan R, et al. TGFbeta1 (Leu10Pro), p53 (Arg72Pro) can predict for increased risk for breast cancer in south Indian women and TGFbeta1 Pro (Leu10Pro) allele predicts response to neo-adjuvant chemo-radiotherapy. *Breast Cancer Res Treat*. 2008; **112**(1): 81-7.
96. Sakiyama T, Kohno T, Mimaki S, Ohta T, Yanagitani N, Sobue T, et al. Association of amino acid substitution polymorphisms in DNA repair genes TP53, POLI, REV1 and LIG4 with lung cancer risk. *Int J Cancer*. 2005; **114**(5): 730-7.
97. Sameer AS, Shah ZA, Syeed N, Banday MZ, Bashir SM, Bhat BA, et al. TP53 Pro47Ser and Arg72Pro polymorphisms and colorectal cancer predisposition in an ethnic Kashmiri population. *Genet Mol Res*. 2010; **9**(2): 651-60.
98. Samson M, Swaminathan R, Rama R, Sridevi V, Nancy KN, Rajkumar T. Role of GSTM1 (Null/Present), GSTP1 (Ile105Val) and P53 (Arg72Pro) genetic polymorphisms and the risk of breast cancer: a case control study from South India. *Asian Pac J Cancer Prev*. 2007; **8**(2): 253-7.
99. Santos AM, Sousa H, Pinto D, Portela C, Pereira D, Catarino R, et al. Linking TP53 codon 72 and P21 nt590 genotypes to the development of cervical and ovarian cancer. *Eur J Cancer*. 2006; **42**(7): 958-63.
100. Sayhan N, Yazici H, Budak M, Bitisik O, Dalay N. P53 codon 72 genotypes in colon cancer. Association with human papillomavirus infection. *Res Commun Mol Pathol Pharmacol*. 2001; **109**(1-2): 25-34.
101. Schildkraut JM, Goode EL, Clyde MA, Iversen ES, Moorman PG, Berchuck A, et al. Single nucleotide polymorphisms in the TP53 region and susceptibility to invasive epithelial ovarian cancer. *Cancer Res*. 2009; **69**(6): 2349-57.
102. Schmidt MK, Reincke S, Broeks A, Braaf LM, Hogervorst FB, Tollenaar RA, et al. Do MDM2 SNP309 and TP53 R72P interact in breast cancer susceptibility? A large pooled series from the breast cancer association consortium. *Cancer Res*. 2007; **67**(19): 9584-90.
103. Schneider-Stock R, Boltze C, Peters B, Szibor R, Landt O, Meyer F, et al. Selective loss of codon 72 proline p53 and frequent mutational inactivation of the retained arginine allele in colorectal cancer. *Neoplasia*. 2004; **6**(5): 529-35.



104. Schneider-Stock R, Mawrin C, Motsch C, Boltze C, Peters B, Hartig R, et al. Retention of the arginine allele in codon 72 of the p53 gene correlates with poor apoptosis in head and neck cancer. *Am J Pathol.* 2004; **164**(4): 1233-41.
105. Sergentanis TN, Economopoulos KP. Eligible and not eligible studies in the recent meta-analysis about p53 polymorphism and breast cancer risk. *Breast Cancer Res Treat.* 2010; **120**(1): 261-2.
106. Siddique MM, Balram C, Fiszer-Maliszewska L, Aggarwal A, Tan A, Tan P, et al. Evidence for selective expression of the p53 codon 72 polymorphs: implications in cancer development. *Cancer Epidemiol Biomarkers Prev.* 2005; **14**(9): 2245-52.
107. Sigurdson AJ, Bhatti P, Doody MM, Hauptmann M, Bowen L, Simon SL, et al. Polymorphisms in apoptosis- and proliferation-related genes, ionizing radiation exposure, and risk of breast cancer among U.S. Radiologic Technologists. *Cancer Epidemiol Biomarkers Prev.* 2007; **16**(10): 2000-7.
108. Singh V, Rastogi N, Mathur N, Singh K, Singh MP. Association of polymorphism in MDM-2 and p53 genes with breast cancer risk in Indian women. *Ann Epidemiol.* 2008; **18**(1): 48-57.
109. Sjalander A, Birgander R, Athlin L, Stenling R, Rutegard J, Beckman L, et al. P53 germ line haplotypes associated with increased risk for colorectal cancer. *Carcinogenesis.* 1995; **16**(7): 1461-4.
110. Sjalander A, Birgander R, Hallmans G, Cajander S, Lenner P, Athlin L, et al. p53 polymorphisms and haplotypes in breast cancer. *Carcinogenesis.* 1996; **17**(6): 1313-6.
111. Smeds J, Nava M, Kumar R, Hemminki K. A novel polymorphism (-88 C>A) in the 5' UTR of the p53R2 gene. *Hum Mutat.* 2001; **17**(1): 82.
112. Sobti RC, Kaur P, Kaur S, Janmeja AK, Jindal SK, Kishan J, et al. Impact of interaction of polymorphic forms of p53 codon 72 and N-acetylation gene (NAT2) on the risk of lung cancer in the North Indian population. *DNA Cell Biol.* 2009; **28**(9): 443-9.
113. Song F, Zheng H, Liu B, Wei S, Dai H, Zhang L, et al. An miR-502-binding site single-nucleotide polymorphism in the 3'-untranslated region of the SET8 gene is associated with early age of breast cancer onset. *Clin Cancer Res.* 2009; **15**(19): 6292-300.
114. Sotamaa K, Liyanarachchi S, Mecklin JP, Jarvinen H, Aaltonen LA, Peltomaki P, et al. p53 codon 72 and MDM2 SNP309 polymorphisms and age of colorectal cancer onset in Lynch syndrome. *Clin Cancer Res.* 2005; **11**(19 Pt 1): 6840-4.
115. Sprague BL, Trentham-Dietz A, Garcia-Closas M, Newcomb PA, Titus-Ernstoff L, Hampton JM, et al. Genetic variation in TP53 and risk of breast cancer in a population-based case control study. *Carcinogenesis.* 2007; **28**(8): 1680-6.
116. Sreeja L, Syamala V, Raveendran PB, Santhi S, Madhavan J, Ankathil R. p53 Arg72Pro polymorphism predicts survival outcome in lung cancer patients in Indian population. *Cancer Invest.* 2008; **26**(1): 41-6.
117. Suspitsin EN, Buslov KG, Grigoriev MY, Ishutkina JG, Ulibina JM, Gorodinskaya VM, et al. Evidence against involvement of p53 polymorphism in breast cancer predisposition. *Int J Cancer.* 2003; **103**(3): 431-3.
118. Szymanowska A, Jassem E, Dziadziuszko R, Borg A, Limon J, Kobienska-Gulida G, et al. Increased risk of non-small cell lung cancer and frequency of somatic TP53 gene mutations in Pro72 carriers of TP53 Arg72Pro polymorphism. *Lung Cancer.* 2006; **52**(1): 9-14.

119. Tan XL, Nieters A, Hoffmeister M, Beckmann L, Brenner H, Chang-Claude J. Genetic polymorphisms in TP53, nonsteroidal anti-inflammatory drugs and the risk of colorectal cancer: evidence for gene-environment interaction? *Pharmacogenet Genomics*. 2007; **17**(8): 639-45.
120. Tarasov VA, Aslanyan MM, Tsyrendorzhievya ES, Litvinov SS, Gar'kavtseva RF, Altukhov YP. Genetically determined subdivision of human populations with respect to the risk of breast cancer in women. *Dokl Biol Sci*. 2006; **406**: 66-9.
121. To-Figueras J, Gene M, Gomez-Catalan J, Galan C, Firvida J, Fuentes M, et al. Glutathione-S-Transferase M1 and codon 72 p53 polymorphisms in a northwestern Mediterranean population and their relation to lung cancer susceptibility. *Cancer Epidemiol Biomarkers Prev*. 1996; **5**(5): 337-42.
122. Tommiska J, Eerola H, Heinonen M, Salonen L, Kaare M, Tallila J, et al. Breast cancer patients with p53 Pro72 homozygous genotype have a poorer survival. *Clin Cancer Res*. 2005; **11**(14): 5098-103.
123. Trifa F, Karray-Chouayekh S, Mabrouk I, Baccouche S, Khabir A, Sellami-Boudawara T, et al. Haplotype analysis of p53 polymorphisms: Arg72Pro, Ins16bp and G13964C in Tunisian patients with familial or sporadic breast cancer. *Cancer Epidemiol*. 2010; **34**(2): 184-8.
124. Ueda M, Terai Y, Kanda K, Kanemura M, Takehara M, Yamaguchi H, et al. Germline polymorphism of p53 codon 72 in gynecological cancer. *Gynecol Oncol*. 2006; **100**(1): 173-8.
125. Wang NM, Tsai CH, Yeh KT, Chen SJ, Chang JG. P53 codon 72Arg polymorphism is not a risk factor for carcinogenesis in the chinese. *Int J Mol Med*. 1999; **4**(3): 249-52.
126. Wang W, Spitz MR, Yang H, Lu C, Stewart DJ, Wu X. Genetic variants in cell cycle control pathway confer susceptibility to lung cancer. *Clin Cancer Res*. 2007; **13**(19): 5974-81.
127. Wang YC, Chen CY, Chen SK, Chang YY, Lin P. p53 codon 72 polymorphism in Taiwanese lung cancer patients: association with lung cancer susceptibility and prognosis. *Clin Cancer Res*. 1999; **5**(1): 129-34.
128. Wang-Gohrke S, Rebbeck TR, Besenfelder W, Kreienberg R, Runnebaum IB. p53 germline polymorphisms are associated with an increased risk for breast cancer in German women. *Anticancer Res*. 1998; **18**(3B): 2095-9.
129. Wasik M, Gorska E, Popko K, Pawelec K, Matysiak M, Demkow U. The Gln223Arg polymorphism of the leptin receptor gene and peripheral blood/bone marrow leptin level in leukemic children. *J Physiol Pharmacol*. 2006; **57 Suppl 4**: 375-83.
130. Webb EL, Rudd MF, Sellick GS, El Galta R, Bethke L, Wood W, et al. Search for low penetrance alleles for colorectal cancer through a scan of 1467 non-synonymous SNPs in 2575 cases and 2707 controls with validation by kin-cohort analysis of 14 704 first-degree relatives. *Hum Mol Genet*. 2006; **15**(21): 3263-71.
131. Weston A, Pan CF, Ksieski HB, Wallenstein S, Berkowitz GS, Tartter PI, et al. p53 haplotype determination in breast cancer. *Cancer Epidemiol Biomarkers Prev*. 1997; **6**(2): 105-12.
132. Weston A, Perrin LS, Forrester K, Hoover RN, Trump BF, Harris CC, et al. Allelic frequency of a p53 polymorphism in human lung cancer. *Cancer Epidemiol Biomarkers Prev*. 1992; **1**(6): 481-3.

133. Zhang X, Miao X, Guo Y, Tan W, Zhou Y, Sun T, et al. Genetic polymorphisms in cell cycle regulatory genes MDM2 and TP53 are associated with susceptibility to lung cancer. *Hum Mutat.* 2006; **27**(1): 110-7.
134. Zhu ZZ, Wang AZ, Jia HR, Jin XX, He XL, Hou LF, et al. Association of the TP53 codon 72 polymorphism with colorectal cancer in a Chinese population. *Jpn J Clin Oncol.* 2007; **37**(5): 385-90.
135. Zubor P, Stanclova A, Kajo K, Hatok J, Klobusiakova D, Visnovsky J, et al. The p53 codon 72 exon 4 BstUI polymorphism and endometrial cancer in Caucasian women. *Oncology.* 2009; **76**(3): 173-83.

## Model specification for Bayesian and maximum likelihood analyses

We wanted to examine the effect of using DNA isolated from tumor tissue vs. normal tissue on the association of the Arg72Pro polymorphism with five common epithelial cancers (lung, breast, colorectal, ovarian, endometrial). Because of loss-of-heterozygosity (LOH), associations in tumor tissue are spurious (biased). We assumed that LOH has the same effect (biases the association by a similar amount) across the five cancer topics; however, we allowed the genetic effect to be different for each cancer subtype.

We specified a two level model: the first level was the patient; the second level was the study. At the second level we have parameters that are common across all five cancer topics. Subscript  $i = [1, 2, \dots, N]$  denotes the study.  $N$  is the number of published studies.

### Level one (within studies)

For the cases and controls in the  $i$ -th study we assume that the number of Pro-encoding alleles,  $r$ , follows a binomial distribution with probability  $p$  (i.e., the true frequency of the minor allele in cases,  $p^{case}$ , and controls,  $p^{con}$ ) out of a sample of size  $n$  (the total number of alleles in each group):

$$r_i^{case} \sim Bin(p_i^{case}, n_i^{case}) \text{ and } r_i^{con} \sim Bin(p_i^{con}, n_i^{con})$$

We assume that the log-transformed odds ratios,  $d_i$ , of each study

$$d_i = \log \frac{p_i^{case}}{1 - p_i^{case}} - \log \frac{p_i^{con}}{1 - p_i^{con}}$$

are random effects that vary by function of a study specific genetic effect,  $d_i^*$ , and its modification by explanatory variables  $x_i$  (an indicator of the use of tumor or normal tissue for genotyping),  $w_i$  (an indicator of whether the study investigated lung cancer),  $z_i$  (an indicator of whether the study investigated colorectal cancer),  $v_i$  (an indicator of whether the study investigated ovarian cancer) and  $g_i$  (an indicator of whether the study investigated endometrial cancer); breast cancer is not encoded by an indicator variable because it serves as the baseline cancer type in this analysis

$$d_i = d_i^* + b_{tissue} \cdot x_i + b_{lung,i} \cdot w_i + b_{colorectal,i} \cdot z_i + b_{ovarian,i} \cdot v_i + b_{endometrial,i} \cdot g_i$$

Here  $b_{tissue}$ ,  $b_{lung}$ ,  $b_{colorectal}$ ,  $b_{ovarian}$  and  $b_{endometrial}$  are the regression coefficients for the indicator variables for use of tumor tissue, lung cancer, colorectal cancer, ovarian cancer and endometrial cancer, respectively.  $d_i^*$  is technically the log odds ratio for breast cancer studies.

## Level two (study level)

We assume that  $d^* \sim N(\bar{\delta}, \tau^2)$ ,  $b_{lung,i} \sim N(\overline{\beta_{lung}}, \tau^2)$ ,  $b_{colorectal,i} \sim N(\overline{\beta_{colorectal}}, \tau^2)$ ,  $b_{ovarian,i} \sim N(\overline{\beta_{ovarian}}, \tau^2)$ ,  $b_{endometrial,i} \sim N(\overline{\beta_{endometrial}}, \tau^2)$  and  $\log \frac{P_i^{con}}{1-P_i^{con}} \sim N(\bar{\mu}, \nu^2)$ , where  $\bar{\delta}$  is the log-transformed “overall” summary effect in breast cancer and  $\bar{\delta} + \overline{\beta_{lung}}$ ,  $\bar{\delta} + \overline{\beta_{colorectal}}$ ,  $\bar{\delta} + \overline{\beta_{ovarian}}$ ,  $\bar{\delta} + \overline{\beta_{endometrial}}$  are the summary log-transformed effect sizes for lung, colorectal, ovarian and endometrial cancer, respectively.  $\bar{\mu}$  is the summary logit-transformed frequency of the minor allele in controls (a nuisance parameter).

In our main analysis the bias effect was treated as a fixed effect across studies with an informative prior distribution. This distribution was based on the results of an individual-patient data meta-analysis of the association between rs1042522 and cervical cancer (Klug, Lancet Oncology, 2009). Specifically, under a dominant genetic model the study reported that the Pro-encoding allele had an odds ratio (OR) of 0.935 (standard error for the log-OR,  $SE_{wbc} = 0.095$ ) among studies using white blood cells for obtaining genotyping material for cases. The corresponding OR for studies using tumor tissue as the source of genotyping material was 0.719 ( $SE_{tissue} = 0.103$ ). Assuming that log-ORs are normally distributed, and because studies used to obtain the aforementioned estimates were independent, the relative log-odds ratio is -0.263 with variance =  $SE_{tissue}^2 + SE_{wbc}^2 = 0.020$ . Thus, we used  $b_{tissue} \sim N(-0.263, 0.020)$  as an informative prior distribution for the bias parameter.

In sensitivity analyses we also used a non-informative prior distribution for the bias effect:  $b_{tissue} \sim N(0, 10^6)$ . Analyses where the bias effect was treated as a random effect across studies produced similar results to the main analyses (not shown).

For all other model parameters (and all analyses performed) we used non-informative priors:  $\bar{\delta} \sim N(0, 10^6)$ ,  $\overline{\beta_{lung}} \sim N(0, 10^6)$ ,  $\overline{\beta_{colorectal}} \sim N(0, 10^6)$ ,  $\overline{\beta_{ovarian}} \sim N(0, 10^6)$ ,  $\overline{\beta_{endometrial}} \sim N(0, 10^6)$ ,  $\bar{\mu} \sim N(0, 10^6)$ ,  $\tau \sim U(0, 10)$  and  $\nu \sim U(0, 10)$ .

## Model estimation

For Bayesian analyses, the model was fit using Markov Chain Monte Carlo (MCMC). For each model we ran 3 MCMC chains for a total of 100,000 iterations, using a burn in of 10,000. Convergence of the MCMC chains was checked by Brooks-Gelman-Rubin criteria and by inspection of trace plots (Brooks SP and Gelman A, Journal of Computational and Graphical Statistics, 1997). We evaluated the fit of the Bayesian models based on the summary Deviance Information Criterion (DIC) as well as inspection of shrinkage plots (graphs of posterior estimates for model parameters plotted along with the prior study estimates). DIC is a deviance measure of goodness of fit equal to the posterior mean of minus twice the log likelihood, penalized by an estimate of the effective number of parameters in the model. DIC is a Bayesian measure analogous to the Akaike Information Criterion used in non-Bayesian analysis, but which can also be applied to hierarchical models. It penalizes the likelihood for addition of parameters so

that models of different complexity can be appropriately compared (Spiegelhalter DJ, et al. *Journal of the Royal Statistical Society, Series B*, 2002).

For maximum likelihood analyses we used mixed effects logistic regression with normal likelihood for the random effects. We used adaptive quadrature to maximize the marginal likelihood over studies (Rabe-Hesketh S, et al. *The Stata Journal*, 2002). These analyses were performed using the `xtmelogit` command in Stata version 11.1/SE (StataCorp, College Station, TX).

## Web Tables

**Web Table 1:** Meta-analysis results for breast, lung, colorectal, ovarian, and endometrial cancer using a 2-level mixed effects logistic regression (Bayesian implementation) model (informative prior).

| Cancer                          | Studies using appropriate DNA sources<br>OR (95% CrI) | Studies using tumor tissue<br>OR (95% CrI) |
|---------------------------------|-------------------------------------------------------|--------------------------------------------|
| Breast cancer                   | 0.99 (0.94-1.03)                                      | 0.77 (0.69-0.87)                           |
| Lung cancer                     | 1.09 (1.01-1.16)                                      | 0.85 (0.74-0.97)                           |
| Colorectal cancer               | 1.09 (0.99-1.20)                                      | 0.85 (0.75-0.98)                           |
| Ovarian cancer                  | 1.05 (0.91-1.19)                                      | 0.82 (0.69-0.97)                           |
| Endometrial cancer              | 1.08 (0.88-1.32)                                      | 0.84 (0.68-1.05)                           |
| Bias effect<br>(across cancers) | 0.78 (0.70-0.88)                                      |                                            |
| *Probability bias <0            | >0.999                                                |                                            |

CrI = credibility interval; OR = odds ratio.

\*This effectively expresses the probability that use of tumor tissue as the source of genotyping material for cases leads to underestimation.

**Web Table 2:** Meta-analysis results for breast, lung, colorectal, ovarian, and endometrial cancer using a 2-level mixed effects logistic regression (Bayesian implementation) model (non-informative prior).

| Cancer                          | Studies using appropriate DNA sources | Studies using tumor tissue |
|---------------------------------|---------------------------------------|----------------------------|
|                                 | OR (95% CrI)                          | OR (95% CrI)               |
| Breast cancer                   | 0.99 (0.94-1.03)                      | 0.78 (0.68-0.88)           |
| Lung cancer                     | 1.09 (1.01-1.16)                      | 0.85 (0.74-0.98)           |
| Colorectal cancer               | 1.09 (0.99-1.20)                      | 0.86 (0.75-0.99)           |
| Ovarian cancer                  | 1.05 (0.92-1.19)                      | 0.83 (0.69-0.99)           |
| Endometrial cancer              | 1.08 (0.89-1.32)                      | 0.85 (0.68-1.06)           |
| Bias effect<br>(across cancers) | 0.79 (0.69-0.89)                      |                            |
| *Probability bias <0            | >0.999                                |                            |

CrI = credibility interval; OR = odds ratio.

\*This effectively expresses the probability that use of tumor tissue as the source of genotyping material for cases leads to underestimation of the genetic effect of the Pro-allele.



**Web Table 3:** Meta-analysis results for breast, lung, colorectal, ovarian, and endometrial cancer using a 2-level mixed effects logistic regression (maximum likelihood) model.

| Cancer                          | Studies using appropriate DNA sources<br>OR (95% CI) | p-value | Studies using tumor tissue<br>OR (95% CI) | p-value |
|---------------------------------|------------------------------------------------------|---------|-------------------------------------------|---------|
| Breast cancer                   | 0.98 (0.94-1.04)                                     | 0.552   | 0.74 (0.66-0.85)                          | <0.001  |
| Lung cancer                     | 1.08 (1.02-1.15)                                     | 0.014   | 0.82 (0.71-0.94)                          | 0.005   |
| Colorectal cancer               | 1.09 (1.00-1.19)                                     | 0.042   | 0.83 (0.72-0.95)                          | 0.006   |
| Ovarian cancer                  | 1.05 (0.94-1.18)                                     | 0.397   | 0.80 (0.67-0.94)                          | 0.008   |
| Endometrial cancer              | 1.09 (0.91-1.32)                                     | 0.350   | 0.83 (0.67-1.02)                          | 0.082   |
| Bias effect<br>(across cancers) | 0.75 (0.67-0.86), p<0.001                            |         |                                           |         |

CI = confidence interval; OR = odds ratio

**Web Table 4:** Meta-analysis results for breast cancer, excluding studies using tumor tissue as the source of genotyping material for cases

| Characteristic    | Studies<br>(cases, controls) | Heterogeneity<br>( $p_Q$ ; $I^2$ ) | OR (95% CI); p-value    |
|-------------------|------------------------------|------------------------------------|-------------------------|
| All studies       | 59 (29801, 35436)            | <0.001; 53%                        | 0.99 (0.94-1.03); 0.532 |
| Ethnicity         | Whites                       | <0.001; 53%                        | 1.01 (0.96-1.06); 0.609 |
|                   | East Asians                  | 0.055; 51%                         | 1.04 (0.92-1.16); 0.525 |
| Control selection | Disease controls             | 0.131; 47%                         | 1.13 (0.93-1.33); 0.239 |
|                   | Healthy controls             | <0.001; 53%                        | 0.98 (0.93-1.02); 0.334 |
| Matching          | No/NR                        | 0.012; 39%                         | 0.97 (0.91-1.02); 0.215 |
|                   | Yes                          | <0.001; 62%                        | 1.01 (0.94-1.08); 0.814 |
| Genotyping QC     | No/NR                        | <0.001; 52%                        | 0.95 (0.87-1.02); 0.162 |
|                   | Yes                          | 0.001; 53%                         | 1.02 (0.96-1.07); 0.560 |
| Blinding          | No                           | <0.001; 55%                        | 0.98 (0.93-1.03); 0.376 |
|                   | Yes                          | 0.249; 26%                         | 1.04 (0.95-1.12); 0.415 |
| Genotyping method | Non-RFLP                     | 0.001; 52%                         | 0.98 (0.93-1.03); 0.484 |
|                   | RFLP                         | <0.001; 56%                        | 1.00 (0.91-1.08); 0.913 |
| HWE               | Compliant                    | <0.001; 48%                        | 1.01 (0.97-1.05); 0.698 |
|                   | In violation                 | 0.003; 61%                         | 0.84 (0.68-1.00); 0.033 |

CI = confidence interval; HWE = Hardy-Weinberg equilibrium; OR = odds ratio;  $p_Q$  = p-value from Cochran's Q statistic; QC = quality control; RFLP = restriction fragment length polymorphism.

**Web Table 5:** Meta-analysis results for lung cancer, excluding studies using tumor tissue as the source of genotyping material for cases

| Characteristic    | Studies<br>(cases, controls) | Heterogeneity<br>( $p_Q$ ; $I^2$ ) | OR (95% CI);<br>p-value  |
|-------------------|------------------------------|------------------------------------|--------------------------|
| All studies       | 39 (16522, 16235)            | <0.001; 54%                        | 1.09 (1.03-1.15); 0.003  |
| Ethnicity         | Whites                       | <0.001; 68%                        | 1.04 (0.93-1.14); 0.521  |
|                   | East Asians                  | 0.067; 41%                         | 1.13 (1.05-1.21); 0.002  |
| Control selection | Disease controls             | 0.234; 19%                         | 1.14 (1.07-1.21); <0.001 |
|                   | Healthy controls             | <0.001; 67%                        | 1.04 (0.95-1.13); 0.356  |
| Matching          | No/NR                        | 0.005; 51%                         | 1.10 (1.03-1.18); 0.010  |
|                   | Yes                          | 0.001; 57%                         | 1.08 (0.99-1.18); 0.105  |
| Genotyping QC     | No/NR                        | <0.001; 59%                        | 1.07 (0.97-1.17); 0.178  |
|                   | Yes                          | 0.018; 47%                         | 1.10 (1.03-1.17); 0.006  |
| Blinding          | No                           | <0.001; 55%                        | 1.09 (1.02-1.16); 0.020  |
|                   | Yes                          | 0.037; 51%                         | 1.09 (0.99-1.19); 0.098  |
| Genotyping method | Non-RFLP                     | <0.001; 65%                        | 1.09 (1.00-1.18); 0.064  |
|                   | RFLP                         | 0.011; 45%                         | 1.09 (1.01-1.18); 0.032  |
| HWE               | Compliant                    | 0.003; 45%                         | 1.10 (1.04-1.15); 0.001  |
|                   | In violation                 | <0.001; 82%                        | 0.95 (0.52-1.38); 0.810  |

CI = confidence interval; HWE = Hardy-Weinberg equilibrium; OR = odds ratio;  $p_Q$  = p-value from Cochran's Q statistic; QC = quality control; RFLP = restriction fragment length polymorphism.

**Web Table 6:** Meta-analysis results for colorectal cancer, excluding studies using tumor tissue as the source of genotyping material for cases

| Characteristic    | Studies<br>(cases, controls) | Heterogeneity<br>( $p_Q$ ; $I^2$ ) | OR (95% CI);<br>p-value |
|-------------------|------------------------------|------------------------------------|-------------------------|
| All studies       | 20 (6951, 9275)              | <0.001; 75%                        | 1.09 (0.98-1.20); 0.136 |
| Ethnicity         | Whites                       | 12 (5273, 6446)                    | 0.358; 9%               |
|                   | East Asians                  | 7 (1592, 2669)                     | 0.005; 67%              |
| Control selection | Disease controls             | 7 (1537, 1935)                     | 0.218; 28%              |
|                   | Healthy controls             | 13 (5414, 7340)                    | <0.001; 83%             |
| Matching          | No/NR                        | 13 (3962, 5272)                    | 0.156; 29%              |
|                   | Yes                          | 7 (2989, 4003)                     | <0.001; 86%             |
| Genotyping QC     | No/NR                        | 10 (1620, 2527)                    | 0.002; 65%              |
|                   | Yes                          | 10 (5331, 6748)                    | <0.001; 81%             |
| Blinding          | No                           | 17 (5886, 7515)                    | <0.001; 77%             |
|                   | Yes                          | 3 (1065, 1760)                     | 0.033; 71%              |
| Genotyping method | Non-RFLP                     | 10 (4559, 5788)                    | 0.266; 19%              |
|                   | RFLP                         | 10 (2392, 3487)                    | <0.001; 78%             |
| HWE               | Compliant                    | 19 (6865, 9115)                    | <0.001; 62%             |
|                   | In violation                 | 1 (86, 160)                        | NA                      |

CI = confidence interval; HWE = Hardy-Weinberg equilibrium; NA = not applicable; OR = odds ratio;  $p_Q$  = p-value from Cochran's Q statistic; QC = quality control; RFLP = restriction fragment length polymorphism.

**Web Table 7:** Meta-analysis results for ovarian cancer, excluding studies using tumor tissue as the source of genotyping material for cases

| Characteristic    |                  | Studies<br>(cases, controls) | Heterogeneity<br>(pQ; I <sup>2</sup> ) | OR (95% CI);<br>p-value |
|-------------------|------------------|------------------------------|----------------------------------------|-------------------------|
| All studies       |                  | 14 (1892, 5146)              | 0.534; 0%                              | 1.10 (1.01-1.19); 0.031 |
| Ethnicity         | Whites           | 12 (1779, 4711)              | 0.567; 0%                              | 1.11 (1.02-1.21); 0.019 |
|                   | East Asians      | 1 (68, 95)                   | NA                                     | 1.15 (0.69-1.60); 0.558 |
| Control selection | Disease controls | 1 (45, 340)                  | NA                                     | 0.78 (0.32-1.24); 0.281 |
|                   | Healthy controls | 13 (1847, 4806)              | 0.650; 0%                              | 1.12 (1.03-1.21); 0.016 |
| Matching          | No/NR            | 9 (1091, 2934)               | 0.674; 0%                              | 1.12 (1.01-1.24); 0.050 |
|                   | Yes              | 5 (801, 2212)                | 0.208; 32%                             | 1.07 (0.90-1.23); 0.437 |
| Genotyping QC     | No/NR            | 6 (484, 910)                 | 0.385; 5%                              | 1.19 (0.99-1.39); 0.086 |
|                   | Yes              | 8 (1408, 4236)               | 0.560; 0%                              | 1.08 (0.98-1.18); 0.131 |
| Blinding          | No               | 13 (1700, 4691)              | 0.476; 0%                              | 1.09 (1.00-1.18); 0.063 |
|                   | Yes              | 1 (192, 455)                 | NA                                     | 1.18 (0.91-1.45); 0.224 |
| Genotyping method | Non-RFLP         | 12 (1755, 4829)              | 0.463; 0%                              | 1.09 (1.00-1.18); 0.071 |
|                   | RFLP             | 2 (137, 317)                 | 0.575; 0%                              | 1.26 (0.96-1.57); 0.135 |
| HWE               | Compliant        | 11 (1512, 4071)              | 0.574; 0%                              | 1.10 (1.00-1.20); 0.065 |
|                   | In violation     | 3 (380, 1075)                | 0.190; 40%                             | 1.12 (0.87-1.38); 0.372 |

CI = confidence interval; HWE = Hardy-Weinberg equilibrium; NA = not applicable; OR = odds ratio; p<sub>Q</sub> = p-value from Cochran's Q statistic; QC = quality control; RFLP = restriction fragment length polymorphism.

**Web Table 8:** Meta-analysis results for endometrial cancer, excluding studies using tumor tissue as the source of genotyping material for cases

| Characteristic    | Studies<br>(cases, controls) | Heterogeneity<br>( $p_Q$ ; $I^2$ ) | OR (95% CI);<br>p-value |
|-------------------|------------------------------|------------------------------------|-------------------------|
| All studies       | 6 (590, 1202)                | 0.265; 22%                         | 1.10 (0.91-1.29); 0.338 |
| Ethnicity         | Whites                       | 4 (368, 665)                       | 0.739; 0%               |
|                   | East Asians                  | 2 (222, 537)                       | 0.080; 67%              |
| Control selection | Disease controls             | 2 (305, 732)                       | 0.803; 0%               |
|                   | Healthy controls             | 4 (285, 470)                       | 0.114; 50%              |
| Matching          | No/NR                        | 4 (278, 582)                       | 0.119; 49%              |
|                   | Yes                          | 2 (312, 620)                       | 0.912; 0%               |
| Genotyping QC     | No/NR                        | 4 (278, 582)                       | 0.119; 49%              |
|                   | Yes                          | 2 (312, 620)                       | 0.912; 0%               |
| Blinding          | No                           | 6 (590, 1202)                      | 0.265; 22%              |
|                   | Yes                          | none                               | NA                      |
| Genotyping method | Non-RFLP                     | 4 (361, 777)                       | 0.700; 0%               |
|                   | RFLP                         | 2 (229, 425)                       | 0.078; 68%              |
| HWE               | Compliant                    | 5 (482, 1107)                      | 0.834; 0%               |
|                   | In violation                 | 1 (108, 95)                        | NA                      |

CI = confidence interval; HWE = Hardy-Weinberg equilibrium; NA = not applicable; OR = odds ratio;  $p_Q$  = p-value from Cochran's Q statistic; QC = quality control; RFLP = restriction fragment length polymorphism.

**Web Table 9:** Meta-regression results for breast, lung and colorectal cancer, excluding studies using tumor tissue as the source of genotyping material for cases.

| <i>Cancer</i>      | <i>Contrast</i>                    | <i>rOR (95% CI)</i>     | <i>p-value</i>   |
|--------------------|------------------------------------|-------------------------|------------------|
| Breast cancer      | East Asians vs. Whites             | 1.02 (0.88-1.17)        | 0.798            |
|                    | Disease vs. healthy controls       | 0.87 (0.70-1.08)        | 0.209            |
|                    | Matching vs. no matching           | 1.05 (0.95-1.16)        | 0.360            |
|                    | Genotyping QC vs. no/NR            | 1.06 (0.96-1.18)        | 0.249            |
|                    | Blinding vs. no/NR                 | 1.05 (0.90-1.23)        | 0.506            |
|                    | RFLP vs. non-RFLP method           | 1.02 (0.91-1.14)        | 0.723            |
|                    | Violations vs. compliance with HWE | <b>0.86 (0.74-0.99)</b> | <b>0.038</b>     |
|                    | Year of publication (continuous)   | 1.07 (0.91-1.25)        | 0.415            |
| Lung cancer        | East Asians vs. Whites             | 0.92 (0.81-1.05)        | 0.199            |
|                    | Disease vs. healthy controls       | 0.99 (0.87-1.13)        | 0.880            |
|                    | Matching vs. no matching           | 1.02 (0.89-1.16)        | 0.807            |
|                    | Genotyping QC vs. no/NR            | 1.00 (0.86-1.16)        | 0.977            |
|                    | Blinding vs. no/NR                 | 1.00 (0.88-1.15)        | 0.955            |
|                    | RFLP vs. non-RFLP method           | 0.97 (0.76-1.24)        | 0.818            |
|                    | Violations vs. compliance with HWE | 1.01 (0.99-1.02)        | 0.303            |
|                    | Year of publication (continuous)   | 1.07 (0.91-1.25)        | 0.415            |
| Colorectal cancer  | East Asians vs. Whites             | <b>1.21 (1.03-1.44)</b> | <b>0.023</b>     |
|                    | Disease vs. healthy controls       | 1.05 (0.80-1.40)        | 0.711            |
|                    | Matching vs. no matching           | 1.25 (0.98-1.61)        | 0.077            |
|                    | Genotyping QC vs. no/NR            | 1.04 (0.80-1.36)        | 0.754            |
|                    | Blinding vs. no/NR                 | 0.97 (0.68-1.39)        | 0.869            |
|                    | RFLP vs. non-RFLP method           | <b>1.31 (1.04-1.65)</b> | <b>0.023</b>     |
|                    | Violations vs. compliance with HWE | <b>2.93 (1.79-4.80)</b> | <b>&lt;0.001</b> |
|                    | Year of publication (continuous)   | 1.01 (0.99-1.04)        | 0.215            |
| Ovarian cancer     | East Asians vs. Whites             | 1.03 (0.65-1.63)        | 0.908            |
|                    | Disease vs. healthy controls       | 1.44 (0.90-2.29)        | 0.129            |
|                    | Matching vs. no matching           | 0.95 (0.80-1.14)        | 0.607            |
|                    | Genotyping QC vs. no/NR            | 0.90 (0.73-1.12)        | 0.363            |
|                    | Blinding vs. no/NR                 | 1.08 (0.81-1.43)        | 0.591            |
|                    | RFLP vs. non-RFLP method           | 1.16 (0.84-1.59)        | 0.361            |
|                    | Violations vs. compliance with HWE | 1.02 (0.82-1.26)        | 0.864            |
|                    | Year of publication (continuous)   | 1.00 (0.96-1.03)        | 0.814            |
| Endometrial cancer | East Asians vs. Whites             | 0.76 (0.52-1.12)        | 0.164            |
|                    | Disease vs. healthy controls       | 0.91 (0.59-1.42)        | 0.678            |
|                    | Matching vs. no matching           | 1.12 (0.73-1.73)        | 0.593            |
|                    | Genotyping QC vs. no/NR            | 1.12 (0.73-1.73)        | 0.593            |
|                    | Blinding vs. no/NR                 | 1.10 (0.91-1.32)        | 0.321            |
|                    | RFLP vs. non-RFLP method           | 0.77 (0.53-1.13)        | 0.189            |
|                    | Violations vs. compliance with HWE | <b>0.60 (0.38-0.94)</b> | <b>0.026</b>     |
|                    | Year of publication (continuous)   | 1.03 (0.94-1.12)        | 0.539            |

CI = confidence interval; HWE = Hardy-Weinberg equilibrium; NR = not reported; RFLP = restriction fragment length polymorphism; QC = quality control; rOR = relative odds ratio. Significant results are shown in bold type.
